# Supplementary material for: Predicting the Treatment Outcomes of Antidepressants Using a Deep Neural Network of Deep Learning in Drug-Naïve Major Depressive Patients
Source: MDPI journal article supplement (doi:10.3390/jpm12050693), 2022-04-26
Supplement: s1 [file s1]

**Supplementary Table S1.** Demographic characteristics and peripheral biochemistry of the enrolled and not enrolled patients.

| Characteristics           | Enrolled<br>(N=70)      | Not enrolled<br>(N=42)  | Comparison    |       |
|---------------------------|-------------------------|-------------------------|---------------|-------|
|                           | Mean $\pm$ SD           | Mean $\pm$ SD           | t/U/ $\chi^2$ | p     |
| Clinical features         |                         |                         |               |       |
| Age, years                | 39.7 $\pm$ 13.3         | 39 $\pm$ 11.8           | 2059.5        | 0.729 |
| HDRS scores of baseline   | 23.9 $\pm$ 5.6          | 24.4 $\pm$ 5.6          | 0.474         | 0.637 |
| Peripheral biochemistry   |                         |                         |               |       |
| BH, cm                    | 160.6 $\pm$ 7.6         | 161.1 $\pm$ 7.1         | 1357.5        | 0.606 |
| BW, kg                    | 56.76 $\pm$ 11.87       | 58.43 $\pm$ 11.94       | 1368.0        | 0.416 |
| BMI, kg/m <sup>2</sup>    | 21.95 $\pm$ 3.84        | 22.48 $\pm$ 4.42        | 0.617         | 0.539 |
| SBP, mmHg                 | 114.9 $\pm$ 17.8        | 113 $\pm$ 16.2          | -0.578        | 0.565 |
| DBP, mmHg                 | 75.1 $\pm$ 9.6          | 76.6 $\pm$ 12.4         | 0.667         | 0.507 |
| Sugar profiles            |                         |                         |               |       |
| AC sugar, mg/dl           | 93.6 $\pm$ 12.1         | 91.1 $\pm$ 12.3         | 1234.0        | 0.424 |
| Insulin, $\mu$ In/ml      | 7.47 $\pm$ 8.59         | 6.38 $\pm$ 5.4          | 1315.5        | 0.850 |
| HbA1c (%)                 | 5.60 $\pm$ 0.36         | 5.62 $\pm$ 0.46         | 1245.5        | 0.690 |
| HOMA-IR                   | 1.87 $\pm$ 2.45         | 1.54 $\pm$ 1.58         | 1284.0        | 0.788 |
| HOMA- $\beta$ (%)         | 84.57 $\pm$ 68.46       | 80.85 $\pm$ 47.59       | 1353.5        | 0.861 |
| Lipid profiles            |                         |                         |               |       |
| Cholesterol, mg/dL        | 193.91 $\pm$ 42.81      | 190.08 $\pm$ 46.94      | 1269.5        | 0.567 |
| TG, mg/dL                 | 107.32 $\pm$ 68.52      | 100.43 $\pm$ 66.04      | 1294.5        | 0.679 |
| HDL, mg/dL                | 55.90 $\pm$ 13.78       | 60.97 $\pm$ 15.51       | 1.693         | 0.095 |
| LDL, mg/dL                | 117.10 $\pm$ 40.18      | 111.49 $\pm$ 44.10      | 1164.5        | 0.354 |
| LDL/HDL                   | 2.23 $\pm$ 1.00         | 1.98 $\pm$ 0.95         | 1107.5        | 0.193 |
| Other biochemical indices |                         |                         |               |       |
| C-peptide, ng/ml          | 1.94 $\pm$ 1.65         | 2.06 $\pm$ 1.75         | 1323.5        | 0.890 |
| Cortisol, $\mu$ g/dL      | 14.5 $\pm$ 6.9          | 13.3 $\pm$ 4.2          | 1221.0        | 0.427 |
| Leptin, ng/mL             | 10.12 $\pm$ 12.18       | 11.02 $\pm$ 13.25       | 1373.5        | 0.687 |
| Oxytocin, pg/mL           | 29.9 $\pm$ 18.3         | 36.1 $\pm$ 18.1         | 1274.0        | 0.055 |
| hsCRP, pg/mL              | 270308.9 $\pm$ 339873.3 | 335136.7 $\pm$ 455223.1 | 1428.0        | 0.600 |

Abbreviations: SD: standard deviation, HDRS: Hamilton Depression Rating Scale, BH: body height, BW: body weight, BMI: body mass index, SBP: systolic blood pressure, DBP: diastolic blood pressure, HOMA-IR: homeostasis model assessment-estimated insulin resistance, HOMA- $\beta$ : homeostasis model assessment for pancreatic  $\beta$  cell function, TG: triglyceride, HDL: high-density lipoprotein, LDL: low-density lipoprotein, hsCRP: high sensitive C-reactive protein.

**Supplementary Table S2.** Questionnaire scores of the enrolled and not enrolled patients.

| Questionnaire                    | Enrolled<br>(N=70) | Not enrolled<br>(N=42) | Comparison |       |
|----------------------------------|--------------------|------------------------|------------|-------|
|                                  | Mean $\pm$ SD      | Mean $\pm$ SD          | t/U        | p     |
| WHOQoL                           |                    |                        |            |       |
| Overall                          | 4.9 $\pm$ 1.6      | 5.1 $\pm$ 1.8          | 1017.0     | 0.692 |
| Physical health                  | 16.8 $\pm$ 5.0     | 19.1 $\pm$ 5.2         | 1.982      | 0.054 |
| Psychological                    | 14.4 $\pm$ 3.8     | 14 $\pm$ 4.5           | -0.345     | 0.731 |
| Social relationship              | 12.9 $\pm$ 3.5     | 13.4 $\pm$ 3.2         | 0.668      | 0.506 |
| Environment                      | 32.2 $\pm$ 6.1     | 32.7 $\pm$ 6.6         | 0.322      | 0.748 |
| Social support scale             |                    |                        |            |       |
| Perceived crisis social support  | 22.1 $\pm$ 5.8     | 23.1 $\pm$ 5.4         | 952.0      | 0.398 |
| Received crisis social support   | 26.6 $\pm$ 7.3     | 28.5 $\pm$ 6.0         | 1.285      | 0.203 |
| Perceived routine social support | 21.1 $\pm$ 6.3     | 21.2 $\pm$ 5.6         | 878.5      | 0.900 |
| Received routine social support  | 23.4 $\pm$ 6.4     | 25.6 $\pm$ 7.7         | 989.0      | 0.166 |
| Life event score                 |                    |                        |            |       |
| Total score                      | 10.2 $\pm$ 9.5     | 13.5 $\pm$ 15.3        | 844.5      | 0.536 |

Abbreviations: SD: standard deviation, WHOQoL: the World Health Organization quality of life.

**Supplementary Table S3.** Cognitive function of the enrolled and not enrolled patients.

| Cognitive Function          | Enrolled<br>(N=70) | Not enrolled<br>(N=42) | Comparison |       |
|-----------------------------|--------------------|------------------------|------------|-------|
|                             | Mean $\pm$ SD      | Mean $\pm$ SD          | U          | p     |
| Finger-Tapping Test         |                    |                        |            |       |
| Dominant finger             | 37.4 $\pm$ 11.2    | 37.4 $\pm$ 11.5        | 1226.5     | 0.992 |
| Nondominant finger          | 36.4 $\pm$ 9.3     | 35.3 $\pm$ 9.2         | 1197.0     | 0.731 |
| Wisconsin Card-Sorting Test |                    |                        |            |       |
| Perseverative errors        | 17 $\pm$ 13.2      | 17.4 $\pm$ 12.4        | 1391.0     | 0.460 |
| Completed categories        | 1.7 $\pm$ 1.6      | 1.6 $\pm$ 1.5          | 1252.0     | 0.850 |
| Continuous Performance test |                    |                        |            |       |
| Unmasked                    | 3.77 $\pm$ 1.18    | 3.75 $\pm$ 1.07        | 1285.0     | 0.968 |
| Masked                      | 2.86 $\pm$ 1.33    | 2.98 $\pm$ 1.12        | 1156.5     | 0.796 |

Abbreviations: SD: standard deviation.

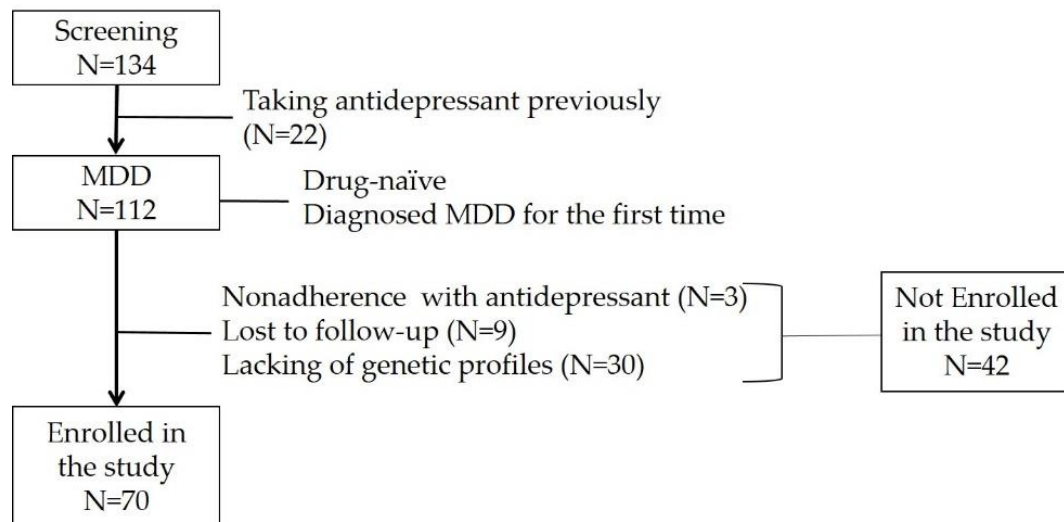

**Supplementary Figure S1.** Flowchart for MDD patients in the study.
